1 Universal latent axes capturing Parkinson's patient deep phenotypic variation reveals patients  
2 with a high genetic risk for Alzheimer's disease are more likely  
3 to develop a more aggressive form of Parkinson's.

4 Cynthia Sandor DMV, PhD<sup>1†</sup>, Stephanie Millin DPhil<sup>2†</sup>, Andrew Dahl DPhil<sup>3</sup>, Michael  
5 Lawton PhD<sup>4</sup>, Leon Hubbard PhD<sup>5</sup>, Bobby Bojovic MS<sup>3</sup>, Marine Peyret-Guzzon PhD<sup>3</sup>,  
6 Hannah Matten MS<sup>3</sup>, Christine Blancher PhD<sup>3</sup>, Nigel Williams PhD<sup>5</sup>, Yoav Ben-Shlomo  
7 PhD<sup>4</sup>, Michele T. Hu MD, PhD<sup>6,7</sup>, Donald G. Grosset MD, PhD<sup>8</sup>, Jonathan Marchini PhD<sup>3,9,\*</sup>,  
8 Caleb Webber PhD<sup>1,2,\*</sup>

9  
10 **Affiliations:**

11 <sup>1</sup>UK Dementia Research Institute, Cardiff University, Cardiff, UK

12 <sup>2</sup>Department of Physiology, Anatomy and Genetics, University of Oxford, Oxford, UK

13 <sup>3</sup>Wellcome Centre for Human Genetics, University of Oxford, Oxford, UK

14 <sup>4</sup>School of Social and Community Medicine, University of Bristol, Bristol, UK

15 <sup>5</sup>MRC Centre for Neuropsychiatric Genetics and Genomics, Institute of Psychological  
16 Medicine and Clinical Neurosciences, School of Medicine, Cardiff University, Cardiff, UK

17 <sup>6</sup>Oxford Parkinson's Disease Centre, Department of Physiology, Anatomy and Genetics, Le  
18 Gros Clark Building, University of Oxford, Oxford, UK

19 <sup>7</sup>Nuffield Department of Clinical Neurosciences, Division of Clinical Neurology, University  
20 of Oxford, Oxford, UK.

21 <sup>8</sup>Department of Neurology, Institute of Neurological Sciences, Queen Elizabeth University  
22 Hospital, Glasgow, United Kingdom

1 <sup>9</sup>Department of Statistics, University of Oxford, Oxford, UK

2

3 \*To whom correspondence should be addressed: E-mail: [webberc4@cardiff.ac.uk](mailto:webberc4@cardiff.ac.uk) &

4 [marchini@stats.ox.ac.uk](mailto:marchini@stats.ox.ac.uk)

5 †Both authors contributed equally to this work.

6

## 1 **Abstract**

2 The generation of deeply phenotyped patient cohorts offers an enormous potential to identify  
3 disease subtypes but are currently limited by the cohort size and the heterogeneity of the  
4 clinical assessments collected across different cohorts. Identifying the universal axes of clinical  
5 severity and progression is key to accelerating our understanding of how disease manifests  
6 and progresses. These universal axes would accelerate our understanding of how Parkinson's  
7 disease (PD) manifests and progresses through which patients may be appropriately  
8 compared appropriately stratified, and personalised therapeutic strategies and treatments can  
9 be developed and targeted. We developed a Bayesian multiple phenotype mixed model  
10 incorporating the genetic relationships between individuals which is able to reduce a wide-  
11 array of different clinical measurements into a smaller number of continuous underlying  
12 factors named phenotypic axis. We identify three principal axes of PD patient phenotypic  
13 variation which are reproducibly found across three independent, deeply and diversely  
14 phenotyped cohorts. Together they explain over 75% of the observed clinical variation and  
15 remain robustly captured with a fraction of the clinically-recorded features. The most  
16 influential axis was associated with the genetic risk of Alzheimer's disease (AD) and involves  
17 genetic pathways associated with neuroinflammation. Our results suggest PD patients with a  
18 high genetic risk for AD are more likely to develop a more aggressive form of PD including,  
19 but not limited to, dementia.

20

## 1 **Introduction**

2           A critical challenge in medicine is to understand why the clinical presentations of  
3 each patient affected by the same disorder vary. This is especially true for Parkinson's disease  
4 (PD), for which the age of onset, the rate of progression, type and severity of symptoms differ  
5 across more than a million people worldwide living with this disease <sup>1</sup>. To accelerate the  
6 identification of disease subtypes, large deeply phenotyped cohorts of PD patients have been  
7 created, in which valuable clinical, imaging, biosample and genetic data has been collected,  
8 and increasingly with longitudinal monitoring <sup>2-4</sup>.

9           Recent studies exploiting these deeply phenotyped cohorts have classified patients  
10 into discrete phenotypic subgroups, each displaying a characteristic set of symptoms <sup>5-7</sup>. To  
11 define PD subtypes, most of these studies employ some form of variable selection to create a  
12 distance matrix between individuals, followed by clustering methods such as k-means or  
13 hierarchical clustering. These methods provide discrete phenotypic groups, which are  
14 appealing in their categorical nature but have many shortfalls. Firstly, while selection  
15 methods quantify how much variance each phenotype explains, no robust method was used to  
16 define a threshold for this measure above which a phenotype contributes to the distance  
17 matrix. Consequently, the definition of which phenotypes are essential to group patients and  
18 which are irrelevant can be somewhat arbitrary. For example, two recent studies <sup>5, 8</sup>, using the  
19 same Parkinson's Progression Markers Initiative (PPMI) cohort show divergent results:  
20 apathy and hallucinations were key subtype classifiers in the first study <sup>8</sup>, but not in the  
21 second one <sup>5</sup>, because these variables were not included. Secondly, K-means clustering  
22 requires the number of phenotypic groups to be prespecified, and this choice has the potential  
23 to be biased towards preconceived expectations with smaller groups ignored or erroneously  
24 joined with larger groups. Finally, the creation of discrete groups may not reflect the

1 possibly continuous nature of phenotypic variability and ignores the greater statistical power  
2 of continuous traits.

3 To overcome these limitations, we propose here an approach focused on the  
4 continuous variation of phenotypes. Rather than focusing on presence versus absence, or mild  
5 versus severe phenotypes, we incorporate the whole spectrum of severity displayed across the  
6 population. For this, we applied PHENIX (PHENotype Imputation eXpediated), a multiple  
7 phenotype mixed model (MPMM) approach initially developed to impute missing  
8 phenotypes<sup>9</sup>, that can also be exploited for genetically-guided dimensionality reduction of  
9 multiple traits. This approach models the phenotypes as a combination of genetic and  
10 environmental factors and the genetic component is computed from the correlation matrix  
11 between the individual's genetic data.

12 Applying PHENIX to the deeply phenotyped UK-based *Discovery* cohort, we identify  
13 a small number of axes underlying individual PD patient phenotypic variation that explain the  
14 variation in the much larger number of clinically-observed phenotypes. We demonstrate the  
15 universality of these axes of phenotypic variation amongst PD patients by independently  
16 deriving similar axes in each of three cohorts: UK *Tracking* cohort including 1807  
17 individuals, the UK *Discovery* cohort including 842 PD patients and US PPMI cohort  
18 including 439 PD patients that has a different clinical structure from the UK cohorts. We  
19 show that this reproducibility is not achieved by other commonly-used dimensionality-  
20 reduction methods. Finally, we demonstrate that the most influential axis was associated with  
21 the genetic risk of Alzheimer's disease (AD) suggesting PD patients with a high genetic risk  
22 for Alzheimer's disease are more likely to develop a more aggressive form of PD including  
23 dementia symptoms.

24

## 1 **Materials and Methods**

### 2 **Discovery cohort**

3 We considered 842 PD cases from the *Discovery* cohort constituted of 1700 subjects,  
4 including over 1000 people with Parkinson's, plus 320 healthy controls and 340 individuals  
5 thought to be 'at-risk' of developing future Parkinson's. Individuals were required to have at  
6 least 90% chance of PD according to UK-Parkinson's disease brain bank criteria, no  
7 alternative diagnosis and disease duration less than 3.5 years. All patients have a clinical  
8 assessment repeated every eighteen months and have been already described<sup>4,6</sup>. Phenotype  
9 data were collected for over a hundred clinical attributes, affecting autonomic, neurological  
10 and motor phenotypes (**Supplementary Fig. 1**) and described in the **Supplementary Table**  
11 **1**. Genotype data were generated using the Illumina HumanCoreExome-12 v1.1 and Illumina  
12 InfiniumCoreExome-24 v1.1 SNP arrays.

### 13 **UK Tracking Parkinson's study**

14 We considered 1807 PD cases from the *Tracking* Parkinson's cohort, which was  
15 already described in detail by Malek *et al.*<sup>2</sup> and was used to identify the impact of mutations  
16 within glucocerebrosidase gene (*GBA*) on different PD clinicals manifestations<sup>10</sup>. Genotype  
17 data were generated using the Illumina Human Core Exome array.

### 18 **PPMI cohort**

19 The PPMI cohort (<http://www.ppmi-info.org>) was already described in detail  
20 (including PPMI protocol of recruitment and informed consent) by Marrek *et al.*<sup>11</sup>. We  
21 downloaded data from the PPMI database on September 2017 in compliance with the PPMI  
22 Data Use Agreement. We considered 472 newly-diagnosed typical PD subjects: subjects with  
23 a diagnosis of PD for two years or less and who are not taking PD medications. We used the  
24 baseline (t=0) of clinical assessments, described in detail in the **Supplementary Table 2**. We

1 excluded any individual with > 5% of missing data (437 individuals included). Participants  
2 have been genotyped using two genotyping arrays, ImmunoChip<sup>12</sup> and NeuroX<sup>13, 14</sup>. As  
3 more participants were genotyped on NeuroX array, we used the genotype data of the  
4 NeuroX chip.

## 5 **Methods**

### 6 **Genotype: quality control & Imputation**

7 Quality control was carried out independently using PLINK v1.9<sup>15</sup> (SI). Imputation of  
8 unobserved and missing variants was carried out separately for each cohort (SI)

### 9 **Phenotypic axis**

10 Our continuous measures of severity are based on a multiple phenotypes mixed model  
11 approach (MPMM) named PHENIX (PHENotype Imputation eXpediated) which includes  
12 genetic relationships between individuals, and is designed to impute missing phenotypes<sup>9</sup>.  
13 To impute missing phenotypes, PHENIX reduces the variation within a cohort to a smaller  
14 number of underlying factors that are then used to predict individual missing values. Here,  
15 we exploit the identification of these underlying factors as providing the latent axes of patient  
16 variation which underlie a larger number of clinically observed phenotypes. The outcome is  
17 that the many clinical phenotypes (sometimes missing for some individuals) of each  
18 individual are represented through a smaller number of underlying latent variables of  
19 phenotypic variation that manifest the observed clinical phenotypes, which we name herein  
20 as *phenotypic axes*.

21 PHENIX<sup>9</sup> use a Bayesian multiple-phenotype mixed model (MPMM), where the correlations  
22 between clinical phenotypes (Y) are decomposed into a genetic and a residual component  
23 with the following model:  $Y=U+e$ , where U represents the aggregate genetic contribution  
24 (whole genotype) to phenotypic variance and e is idiosyncratic noise. As the estimation of

1 maximum likelihood covariance estimates can become computationally expensive with  
2 increasing number of phenotypes, PHENIX uses a Bayesian low-rank matrix factorization  
3 model for the genetic term  $U$  such as:  $U = S\beta$ , in which  $\beta$  is can be used to estimate the  
4 genetic covariance matrix between phenotypes and  $S$  represents a matrix of latent  
5 components that each follow  $\sim N(0, G)$  where  $G$  is the Estimate of Relatedness Matrix from  
6 genotypes. The resulting latent traits ( $S$ ) are used as phenotypic axes, each representing the  
7 severity of a number of non-independent clinical phenotypes. The details to run PHENIX and  
8 extract the phenotypic axes are given in the **Supplemental Information**.

### 9 **Disease phenotypic axis**

10 We derived disease phenotypic axis consisting to replace the general genetic component in a  
11 MPMM by a disease risk genetics component. To calculate a disease relatedness matrix, we  
12 considered only genetic variants (after pruning) associated with human complex traits. For  
13 different complex human traits with GWA results publically available (**Supplementary**  
14 **Table 01**), we calculated a disease relatedness, that we used subsequently to derive  
15 phenotypic axes (**Supplementary Information**).

16

## 17 **Results**

### 18 **Three continuous measures capture 75% of the clinical variation.**

19 Initially, we generated phenotypic axes from a cohort of 842 PD patients (*Discovery cohort*)  
20 which had been genotyped and phenotypically characterised with 40 clinical assessments  
21 (**Supplementary Table 1**). Each latent axis reflected a number of co-varying observed  
22 clinical assessments. Among the phenotypic axes that explained more than 5%, Axes 1, 2 and  
23 3 explained 39.6%, 28.7% and 6.8% of the clinical variation respectively. Together, these 3  
24 top axes account for over 75% of the clinically-observed variation (**Supplementary Fig. 2**).



1 To examine whether similar phenotypic axes are obtained in different deeply phenotyped PD  
2 cohorts, we derived phenotypic axes within an independent cohort of 1807 PD individuals  
3 from the UK *Tracking* cohort <sup>2</sup> that had made similar clinical observations to the *Discovery*  
4 cohort. We found significant Pearson's correlation coefficients between each cohort's first  
5 three phenotypic axes: Axis 1  $r=0.92$  ( $p=3 \times 10^{-13}$ ), Axis 2  $r=0.89$  ( $p=4 \times 10^{-11}$ ), Axis 3  
6  $r=0.72$  ( $p=5 \times 10^{-6}$ ) (**Fig. 1**). Nevertheless, a major concern was that the identification of the  
7 same phenotypic axes might, at least in part, be due to the very similar structure of the  
8 clinical phenotyping between the two UK cohorts. To address this, we examined the  
9 independent US-based PPMI cohort consisting of 439 sporadic PD individuals that had been  
10 clinically phenotyped following a substantially different protocol to the UK cohorts. After  
11 deriving phenotypic axes in the PPMI cohort, we found significant similarities between the  
12 first three phenotypic axes derived for both the *Discovery*-UK and PPMI-US cohorts: the  
13 coefficients of determination ( $R^2$ ) between three first axes across different categories of  
14 clinical phenotypes from each cohort were: Axis1: 0.665 ( $p=0.048$ ), Axis 2: 0.914 ( $p=0.003$ )  
15 and Axis 3: 0.754 ( $p=0.025$ ) (**Fig. 2 & Supplementary Figure 3**). These consistent  
16 similarities in the axes of phenotypic variation independently derived for each of three  
17 different PD cohorts demonstrates the reproducibility of these axes of phenotypic variation  
18 amongst Parkinson's patients. Finally, by comparing PHENIX with other methods of  
19 dimensionality reduction, specifically Principle Component Analyses (PCA),  
20 Multidimensional Scaling (MDS) and Independent component analysis (ICA), only the  
21 dimensions discovered by the MPMM model, PHENIX, were significantly correlated  
22 between both cohorts and thus no other method was able to identify similar axes of  
23 phenotypic variation across UK and US PD cohorts (**Fig. 2**).

24 **Each phenotypic axis represents a distinct set of clinical features**

1 To interpret the clinical relevance of each phenotypic axis, we examined the  
2 correlation between individual clinical features and the phenotypic axes (**Table 1 & Fig. 1 &**  
3 **Supplementary Figure 4**). We observed that each phenotypic axis corresponded to a subset  
4 of clinical features, differing in both extents and directions of severity. Axis 1 represented  
5 worsening non-tremor motor phenotypes, anxiety and depression accompanied by a decline  
6 of the cognitive function (**Table 1 & Fig. 3**). Worsening anxiety and depression were also  
7 features of Axis 2, in addition to increasing severity of autonomic symptoms and increasing  
8 motor dysfunction. Axis 3 was associated with general motor symptom severity including  
9 rigidity, bradykinesia and tremor of the whole body independently of non-motor features.  
10 The contribution of different phenotypes to these axes was therefore highly variable. Specific  
11 aspects of motor dysfunction were important factors in defining the majority of axes. Anxiety  
12 and depression were also relatively important features, but only for axes explaining the  
13 largest amounts of variation. Conversely, cognitive impairment was associated only with  
14 Axis one. However, this observation must be weighted by the fact that cognitive  
15 impairment/dementia are reported at a later disease stage and thus likely under-represented in  
16 recently diagnosed cases.

17 Although each phenotypic axis is associated with a distinct set of clinical features,  
18 they are not independent but instead strongly correlated (**Supplementary Figure 5**). We find  
19 no significant relation between the phenotypic axes and principal components of genetic  
20 ancestry (**Methods**) suggesting that the phenotypic axes are not biased by the population  
21 structure (**Supplementary Figure 5, Supplementary Table 3**). However, as previously  
22 reported, gender influences clinical symptoms<sup>4</sup> and we also observe a significant association  
23 between gender and Axis 2 (**Supplementary Table 3,  $p=4.5 \times 10^{-5}$** ).

24 To assess to what extent the phenotypic axes might be affected by the number of clinical  
25 observations, within the *Discovery* cohort we compared the phenotypic axes built on all

1 clinical features with phenotypic axes generated with incomplete sets of randomly-selected  
2 clinical features. We observed a strong correlation ( $r > 0.8$ ) between each of the two first  
3 phenotypic axes built with as few as 50% of the clinical variables and their respective  
4 original phenotypic axes, suggesting that these two axes are extremely robust in terms of the  
5 numbers of clinical variables considered (**Supplementary Figure 6**).

## 6 **The integration of genetic relationships between patients improves capture of the** 7 **Parkinson's disease clinical variation and reproducibility.**

8 The PHENIX MPMM approach employed here to derive phenotypic axes exploits the  
9 genetic relatedness between individuals derived from genotypic similarity to further  
10 decompose random effects into kinship effects between individuals. In its original application  
11 to imputing missing phenotypes, PHENIX outperforms other imputation approaches when  
12 the heritability ( $h^2$ ) of a phenotype increased<sup>9</sup>. Similarly, when randomly removing and re-  
13 imputing 10% of observed data, the quality of the imputation of PD clinical assessments was  
14 in general better when considering the genetic relatedness between individuals as compared  
15 to excluding this information (**Supplementary Figure 7**), suggesting that the resulting  
16 phenotypic axes better capture PD heterogeneity when including genetic information.  
17 Moreover, we found a higher agreement between the phenotypic axes derived by integrating  
18 the genetic relationship between patients of different cohorts than when the phenotypic axes  
19 were derived ignoring the genetic relationships (**Supplementary Figure 8**). Specifically, the  
20 coefficient of determination reflecting the agreement between the axes derived from the  
21 Discovery and those derived from the PPMI cohorts were from Axis 1 to 3: 0.665 ( $p=0.048$ ),  
22 0.914 ( $p=0.003$ ) and 0.754 ( $p=0.025$ ) when including the genetic similarity between patients  
23 as compared to 0.604 ( $p=0.069$ ), 0.908 ( $p=0.003$ ) and 0.001 ( $p=0.991$ ) without. Together,  
24 these findings demonstrate that the integration of genetic relationship between patients  
25 enhances the resulting phenotypic axes' ability to reproducibly capture PD clinical variation.

## 1 **Metanalysis of Genome Wide Association Studies with phenotypic axes as unique and** 2 **universal quantitative traits**

3 Each phenotypic axis provides a quantitative trait enabling the genetics underlying  
4 patient variation to be studied by performing a Genome Wide Association Study (GWAS) via  
5 a regression model with the covariates age, gender, and two genetic principal components (to  
6 account for any underlying population substructure) in each individual cohort. As three  
7 phenotypic axes were similar across each individual cohort (*Discovery*, *Tracking* and PPMI)  
8 and to increase statistical power to detect an significant association, we conducted a meta-  
9 analysis of each phenotypic axis genome-wide association studies using a common set of  
10 4211937 variants across 3088 individuals. A significant departure from the expected  
11 quantiles was observed for Axis 1 (meta-analysis combining the summary statistic of three  
12 individual GWAS [*Discovery*-*Tracking*-PPMI]) (**Supplementary Figure 9**), but no variant  
13 surpassed genome-wide significance (**Supplementary Figure 10**). Although we did not  
14 observe a significant genome-wide association, the use of universal phenotypic axes  
15 significantly unable us to conduct meta-analysis and thus to increase the statistical power to  
16 identify genetic variants through their ability to align differently deeply phenotyped cohorts  
17 and reduce the number of traits tested.

18 Next, we re-examined genetic associations for each of the three phenotypic axes for  
19 three major PD risk genes, namely *SNCA*, *GBA* and *LRRK2*. We found a indicative local  
20 association signal but however un-significant at GWA level with Phenotypic Axis 1 for a  
21 variant in *SNCA*: 4: 90758437 (p-value=1.7x10<sup>-4</sup>, **Supplementary Figure 11A**) which is in  
22 high LD with rs1348224 ( $r^2 > 0.8$ ), a SNP previously associated with PD with dementia and  
23 dementia with Lewy bodies<sup>20</sup>. SNP rs1348224:G allele (minor allele) had a negative effect  
24 on Phenotypic Axis 1, thus a protective effect for cognitive impairment, which is consistent  
25 with a protective effect for PD with dementia and dementia with Lewy bodies previously

1 reported for this locus <sup>20</sup>. We also found a indicative local association signal (p-  
2 value= $1.1 \times 10^{-4}$ ) with Phenotypic Axis 3 for an intronic variant in *LRRK2* (**Supplementary**  
3 **Figure 11B**). Both *SNCA* and *LRRK2* variants were each nominally associated with only one  
4 phenotypic axis (**Supplementary Table 4**), suggesting distinct pathogenic mechanisms.

### 5 **Parkinson patients carrying a high genetic risk for Alzheimer's are more** 6 **likely to develop a more aggressive form of Parkinson's**

7 To better understand the genetics risk factors influencing the phenotypic axis, we  
8 calculated a disease-risk relatedness matrix in the MPMM, based on genetic variants  
9 associated with different complex human traits. For example, replacing the overall genetic  
10 similarity by how similar people are in their risk of diabetes or depression. By examining the  
11 proportion of phenotypic variation explained by different phenotypic axis derived using these  
12 different disease risks as compared to the original phenotypic axes derived using the entire  
13 genotype, we showed that the phenotypic axis derived using Alzheimer's disease (AD)  
14 genetic risk significantly outperforms (capture more patient phenotypic variation) the original  
15 phenotypic axes (**Fig. 4**)

16 This result proposes that PD patients carrying a high genetic risk for AD are more likely to  
17 develop a more aggressive form of PD including dementia symptoms: Axis 1 represents  
18 worsening non-tremor motor phenotypes, anxiety and depression accompanied by a decline  
19 of the cognitive function (preprint Table 1 & Fig. 2) Testing this hypothesis in the PPMI  
20 cohort, we found a significant relationship between Phenotypic Axis 1 and CSF A $\beta$ 1-42, a  
21 biomarker strongly associated with future conversion to dementia. Secondly, as for AD  
22 genetics risk and unlikely to PD genetics risk, we found an association of phenotypic axis 1  
23 risk variants with microglia-expressed genes, in both the SN and the cortex suggesting that  
24 the neuro-inflammation play a key role in the development a more aggressive form of PD,  
25 but not in the PD onset-risk. Finally we observed the phenotypic axis one is associated with

- 1 rapid progression of multiple clinical symptoms suggesting that AD genetic risk score in PD
- 2 patients could be used as a predictor of progression

## 1 **Discussion**

2 We propose here a novel approach to quantifying diverse patient phenotypes on a  
3 continuous scale via the use of phenotype axes. This approach overcomes many of the  
4 limitations associated with the clustering methods previously used to classify PD  
5 heterogeneity. By applying our approach to three independent and deeply phenotyped  
6 cohorts, we demonstrate the universality of these axes of phenotypic variation amongst PD  
7 patients. We also showed that our axes are robustly derived when reducing the number of  
8 clinical features considered and, unlike other dimensionality reduction methods, the PHENIX  
9 MPMM approach is the only method tested here that is able to identify the same phenotypic  
10 axes underlying PD patient variation between individuals from different cohorts. The  
11 phenotypic axes have multiple applications in PD precision medicine. We found that PD  
12 patients carry on a high genetic risk load for Alzheimer's disease can develop a more clinical  
13 aggressive PD form including dementia symptoms.

14 Our approach was able to identify representative quantitative variables that are  
15 clinically relevant to previously-defined categorical PD subtypes. A number of known  
16 comorbidities were represented among the phenotype axes. Anxiety and depression are  
17 highly correlated in PD patients, both of which are correlated with Axes 1 and 2<sup>26</sup>. Rigidity  
18 and bradykinesia are also linked, possibly due to shared physiology<sup>27</sup>, and varied in the same  
19 direction along Axis 3. Lawton *et al.* reported five PD subgroups, by using the same  
20 *Discovery* cohort but following a k-means clustering approach<sup>6</sup>. We examined the  
21 distribution of phenotypic axis score across these five PD subgroups (**Supplementary Figure**  
22 **16**) and noted that the 5<sup>th</sup> subgroup of patients, characterised by severe motor, non-motor and  
23 cognitive disease, with poor psychological well-being clinical symptoms, were systematically  
24 associated with high severity score for all three of our phenotypic axes. Inversely, the first PD  
25 subgroup characterised by mild motor and non-motor disease (group affected by fewer

1 clinical symptoms) displayed a low severity score for our three phenotypic axes.  
2 Furthermore, we observed that the individuals of subgroups 4 and 5, characterised by poor  
3 psychological well-being, had high severity scores for phenotypic axis 2, the axis most  
4 associated with depression and anxiety symptoms. These observations demonstrate some  
5 consistency between subgroups defined with k-means and our phenotypic axis severity score.  
6 The agreement of these phenotype axes with previously observed correlations provides  
7 further support for underlying biological themes, but their reinterpretation as robust  
8 continuous traits likely provides a better approximation of how the underlying biology  
9 contributes, as opposed to a cut-off off for a phenotype. Specifically, the unimodal character  
10 of the phenotypic axis distributions (**Supplementary Figure 17**) suggests here that the  
11 development of continuous measures is more appropriate than clustering according to an  
12 arbitrary threshold.

13         The phenotypic axes identified were robust in terms of the number of clinical features  
14 considered and enable the alignment of patients from different cohorts with different clinical  
15 phenotyping structures. The corollary is that Phenix did not require the variable selection  
16 common in PD clustering approaches, and it can also guide clinicians in determining which  
17 clinical assessments are essential to capture PD heterogeneity. Deep phenotyping is  
18 burdensome to both patient and clinician and many of the measures exploited here are  
19 compound scores summarising aspects of functioning. Further work identifying the  
20 minimally burdensome observations that enable robust scoring of patients along these  
21 phenotypic axes would facilitate their utility and adoption across the PD clinical community,  
22 bringing increased power to the discovery of influencing factors. Finally, the MPMM  
23 approach can be readily extended to include longitudinal data to determine the phenotypic  
24 axes associated with disease progression while simultaneously dealing with missing data,  
25 which is a common problem in longitudinal studies.



1           In conclusion, these universal axes have the potential to accelerate our understanding  
2 of how PD presents in individual patients, providing more robust and objective quantitative  
3 traits through which patients may be appropriately compared, through which the underlying  
4 disease-modifying mechanism can be understood and appropriately stratified/personalised  
5 therapeutic strategies and treatments can be developed.

6

## 7 **Acknowledgments**

8 The work was supported by the Monument Trust Discovery Award from Parkinson's UK.  
9 Oxford Genomics Centre at the Wellcome Centre for Human Genetics, Oxford is Funded by  
10 Wellcome Trust (grant reference 090532/Z/09/Z and MRC Hub grant G0900747 91070)  
11 Samples and associated clinical data were supplied by the Oxford Parkinson's Disease Centre  
12 (OPDC) study, funded by the Monument Trust Discovery Award from Parkinson's UK, a  
13 charity registered in England and Wales (2581970) and in Scotland (SC037554), with the  
14 support of the National Institute for Health Research (NIHR) Oxford Biomedical Research  
15 Centre based at Oxford University Hospitals NHS Trust and University of Oxford, and the  
16 NIHR Comprehensive Local Research Network. CW is supported by a UK DRI fellowship  
17 funded by Medical Research Council (MRC), Alzheimer's Society and Alzheimer's Research  
18 UK. CW and CS are supported by Computational Science Program funded by Michael J. Fox  
19 Foundation. JM acknowledges funding for this work from the European Research Council  
20 (ERC; grant 617306) . We thank the Oxford Genomics Centre at the Wellcome Centre for  
21 Human Genetics, Oxford) for the generation genotyping data.

22

## 23 **Conflict of interest**

24 The authors declare that they have no competing interests.

## 1   **References**

2

- 3   1.   Foltynie T, Brayne C, Barker RA. The heterogeneity of idiopathic Parkinson's  
4       disease. *J Neurol* 2002; **249**(2): 138-145.
- 5
- 6   2.   Malek N, Swallow DM, Grosset KA, Lawton MA, Marrinan SL, Lehn AC *et al.*  
7       Tracking Parkinson's: Study Design and Baseline Patient Data. *J Parkinsons Dis*  
8       2015; **5**(4): 947-959.
- 9
- 10  3.   PPMI. PPMI.
- 11
- 12  4.   Szewczyk-Krolikowski K, Tomlinson P, Nithi K, Wade-Martins R, Talbot K, Ben-  
13       Shlomo Y *et al.* The influence of age and gender on motor and non-motor features of  
14       early Parkinson's disease: initial findings from the Oxford Parkinson Disease Center  
15       (OPDC) discovery cohort. *Parkinsonism Relat Disord* 2014; **20**(1): 99-105.
- 16
- 17  5.   Fereshtehnejad SM, Zeighami Y, Dagher A, Postuma RB. Clinical criteria for  
18       subtyping Parkinson's disease: biomarkers and longitudinal progression. *Brain* 2017;  
19       **140**(7): 1959-1976.
- 20
- 21  6.   Lawton M, Baig F, Rolinski M, Ruffman C, Nithi K, May MT *et al.* Parkinson's  
22       Disease Subtypes in the Oxford Parkinson Disease Centre (OPDC) Discovery Cohort.  
23       *J Parkinsons Dis* 2015; **5**(2): 269-279.
- 24
- 25  7.   Lawton M, Ben-Shlomo Y, May MT, Baig F, Barber TR, Klein JC *et al.* Developing  
26       and validating Parkinson's disease subtypes and their motor and cognitive  
27       progression. *Journal of Neurology, Neurosurgery & Psychiatry* 2018.
- 28
- 29  8.   Erro R, Picillo M, Vitale C, Palladino R, Amboni M, Moccia M *et al.* Clinical clusters  
30       and dopaminergic dysfunction in de-novo Parkinson disease. *Parkinsonism Relat*  
31       *Disord* 2016; **28**: 137-140.
- 32
- 33  9.   Dahl A, Iotchkova V, Baud A, Johansson A, Gyllensten U, Soranzo N *et al.* A  
34       multiple-phenotype imputation method for genetic studies. *Nat Genet* 2016; **48**(4):  
35       466-472.
- 36
- 37  10.  Malek N, Weil RS, Bresner C, Lawton MA, Grosset KA, Tan M *et al.* Features of  
38       GBA-associated Parkinson's disease at presentation in the UK Tracking Parkinson's  
39       study. *J Neurol Neurosurg Psychiatry* 2018.
- 40
- 41  11.  Parkinson Progression Marker I. The Parkinson Progression Marker Initiative (PPMI).  
42       *Prog Neurobiol* 2011; **95**(4): 629-635.
- 43
- 44  12.  Parkes M, Cortes A, van Heel DA, Brown MA. Genetic insights into common  
45       pathways and complex relationships among immune-mediated diseases. *Nat Rev*  
46       *Genet* 2013; **14**(9): 661-673.
- 47

- 1 13. Nalls MA, Bras J, Hernandez DG, Keller MF, Majounie E, Renton AE *et al.* NeuroX,  
2 a fast and efficient genotyping platform for investigation of neurodegenerative  
3 diseases. *Neurobiol Aging* 2015; **36**(3): 1605 e1607-1612.  
4
- 5 14. Nalls MA, Keller MF, Hernandez DG, Chen L, Stone DJ, Singleton AB *et al.*  
6 Baseline genetic associations in the Parkinson's Progression Markers Initiative  
7 (PPMI). *Mov Disord* 2016; **31**(1): 79-85.  
8
- 9 15. Purcell S, Neale B, Todd-Brown K, Thomas L, Ferreira MA, Bender D *et al.* PLINK:  
10 a tool set for whole-genome association and population-based linkage analyses. *Am J*  
11 *Hum Genet* 2007; **81**(3): 559-575.  
12
- 13 16. Andreassen OA, Zuber V, Thompson WK, Schork AJ, Bettella F, Consortium P *et al.*  
14 Shared common variants in prostate cancer and blood lipids. *Int J Epidemiol* 2014;  
15 **43**(4): 1205-1214.  
16
- 17 17. Andreassen OA, Djurovic S, Thompson WK, Schork AJ, Kendler KS, O'Donovan  
18 MC *et al.* Improved detection of common variants associated with schizophrenia by  
19 leveraging pleiotropy with cardiovascular-disease risk factors. *Am J Hum Genet* 2013;  
20 **92**(2): 197-209.  
21
- 22 18. Zuber V, Jonsson EG, Frei O, Witoelar A, Thompson WK, Schork AJ *et al.*  
23 Identification of shared genetic variants between schizophrenia and lung cancer. *Sci*  
24 *Rep* 2018; **8**(1): 674.  
25
- 26 19. Winsvold BS, Bettella F, Witoelar A, Anttila V, Gormley P, Kurth T *et al.* Shared  
27 genetic risk between migraine and coronary artery disease: A genome-wide analysis  
28 of common variants. *PLoS One* 2017; **12**(9): e0185663.  
29
- 30 20. Guella I, Evans DM, Szu-Tu C, Nosova E, Bortnick SF, Group SCS *et al.* alpha-  
31 synuclein genetic variability: A biomarker for dementia in Parkinson disease. *Ann*  
32 *Neurol* 2016; **79**(6): 991-999.  
33
- 34 21. Andreassen OA, Thompson WK, Schork AJ, Ripke S, Mattingsdal M, Kelsoe JR *et*  
35 *al.* Improved detection of common variants associated with schizophrenia and bipolar  
36 disorder using pleiotropy-informed conditional false discovery rate. *PLoS Genet*  
37 2013; **9**(4): e1003455.  
38
- 39 22. Noyce AJ, Kia DA, Hemani G, Nicolas A, Price TR, De Pablo-Fernandez E *et al.*  
40 Estimating the causal influence of body mass index on risk of Parkinson disease: A  
41 Mendelian randomisation study. *PLoS Med* 2017; **14**(6): e1002314.  
42
- 43 23. Brainstorm C, Anttila V, Bulik-Sullivan B, Finucane HK, Walters RK, Bras J *et al.*  
44 Analysis of shared heritability in common disorders of the brain. *Science* 2018;  
45 **360**(6395).  
46
- 47 24. Nalls MA, Saad M, Noyce AJ, Keller MF, Schrag A, Bestwick JP *et al.* Genetic  
48 comorbidities in Parkinson's disease. *Hum Mol Genet* 2014; **23**(3): 831-841.  
49

- 1 25. Birtwistle J, Baldwin D. Role of dopamine in schizophrenia and Parkinson's disease.  
2 *Br J Nurs* 1998; **7**(14): 832-834, 836, 838-841.  
3
- 4 26. Menza MA, Robertson-Hoffman DE, Bonapace AS. Parkinson's disease and anxiety:  
5 comorbidity with depression. *Biol Psychiatry* 1993; **34**(7): 465-470.  
6
- 7 27. Berardelli A, Rothwell JC, Thompson PD, Hallett M. Pathophysiology of  
8 bradykinesia in Parkinson's disease. *Brain* 2001; **124**(Pt 11): 2131-2146.  
9  
10  
11

## 1 **Figure Legends**

2 **Fig. 1. The clinical phenotypes of two independent deeply phenotyped Parkinson's**  
3 **disease cohorts identify the same phenotypic axes.** Results were consistent in two  
4 independent cohorts (842 *Discovery* and 1807 *Tracking* patients). Examination of  
5 these two separate Parkinson's disease cohorts, using independent derivation of the  
6 phenotypic axes in each, showed significant correlations between each cohort's first  
7 three axes. Correlations between the axes from each cohort are Axis 1  $r=0.92$  ( $p=3 \times$   
8  $10^{-13}$ ), Axis 2  $r=0.89$  ( $p=4 \times 10^{-11}$ ), Axis 3  $r=0.72$  ( $p=5 \times 10^{-6}$ ). The correlation  
9 coefficient (x-axis) between each axis derived in each cohort (blue: *Discovery* vs red:  
10 *Tracking*) and each clinical observation (y-axis) is shown.

11

12 **Fig. 2. The reduced dimensions in other dimensionality reduction methods fail to align**  
13 **between differently but deeply phenotyped UK and US Parkinson's disease**  
14 **cohorts.** We compared the ability of different dimensionality reduction methods  
15 (independent component analysis (ICA), Multidimensional scaling (MDS), Principal  
16 component analysis (PCA) and phenotypic axis based on the PHENIX multiple  
17 phenotype mixed model) to phenotypically align two deeply phenotyped Parkinson's  
18 disease cohorts, specifically the *Discovery* (842 individuals) and PPMI (439 sporadic  
19 Parkinson's disease) cohorts. The x-axis and y-axis represent the correlation  
20 coefficient between each continuous variable with clinical observation associated with  
21 a specific symptom category in *Discovery* and PPMI cohort respectively. Each  
22 column panel and colour of points ("Axis") represents the dimension level of each  
23 underlying dimension. All points on the diagonal would represent a perfect  
24 phenotypic alignment of both cohorts. We examined the relationship between

1 correlation derived from both cohorts by performing a linear regression:  $R^2$  and  $p$   
2 correspond to the coefficient of determination and the  $p$ -value respectively. Only the  
3 dimensions discovered by the MPMM model, PHENIX, show a significant  
4 relationship between both cohorts: MPMM phenotypic axes ( $R^2=0.86$ ,  $p=2 \times 10^{-8}$ ),  
5 MDS ( $R^2=0.11$ ,  $p=0.18$ ), ICA ( $R^2=0.17$ ,  $p=0.16$ ) and PCA ( $R^2=0.31$ ,  $p=0.06$ ).

6  
7

8 **Fig. 3. The correlation of individual clinically-measured Parkinson's disease**  
9 **phenotypes with an underlying Phenotypic Axis 1.** Modelling patient clinical  
10 phenotypes as a combination of genetic and environmental factors revealed three  
11 phenotypic severity axes (**Fig.1**), each representing a continuous pattern of variation  
12 between multiple co-varying clinical phenotypes. In Axis 1 (shown), (A) clinical  
13 measures relating to anxiety and depression and apathy are significantly and  
14 positively correlated with an individual's score along this axis; patients with a higher  
15 axis score have more severe mood and neuropsychiatric problems. (B) The severity of  
16 motor phenotypes is positively correlated with this phenotypic axis; patients with a  
17 higher axis score is associated with more severe motor phenotypes (C) Cognitive tests  
18 were negatively correlated with this component (the patients that score high in these  
19 cognitive tests have less cognitive impairments); individuals with a high score for this  
20 component suffer from more severe anxiety, depression and displayed more cognitive  
21 impairment and motor symptoms.

22

1

2 **Fig. 4. Alzheimer's disease phenotypic axis significantly outperforms the original**  
3 **phenotypic axis.** These heatmap plots represents for two first phenotypic axes  
4 (left=V1 and right=V2), in the 3 cohorts (row1=Discovery, row2=Tracking & row 3=  
5 ) the excess(red) or deficit of the phenotypic variance explained by the different  
6 disease axes (columns) compared with the original phenotypic axes.

7

8

1 **Table1:** Correlation between each axis and each clinical phenotypic measure

|                             |                      |                                                                                                                           |   | r     |       |       |
|-----------------------------|----------------------|---------------------------------------------------------------------------------------------------------------------------|---|-------|-------|-------|
| <b>Clinical Observation</b> |                      |                                                                                                                           |   | Axis1 | Axis2 | Axis3 |
| <b>Behavior</b>             | BDI total            | Measure of the depression                                                                                                 | + | 0.60  | 0.60  | 0.01  |
|                             | Leeds Anxiety Total  | Measure of the anxiety                                                                                                    | + | 0.51  | 0.55  | 0.05  |
|                             | Leeds Depression     | Measure of the depression                                                                                                 | + | 0.51  | 0.62  | 0.00  |
|                             | QUIP all             | Impulsive-Compulsive Disorders                                                                                            | + | 0.12  | 0.24  | 0.03  |
|                             | UPDRS apathy         | Apathy                                                                                                                    | + | 0.40  | 0.39  | 0.18  |
|                             | UPDRS fatigue        | Fatigue                                                                                                                   | + | 0.49  | 0.49  | 0.08  |
|                             | UPDRS hallucinations | Hallucinations                                                                                                            | + | 0.17  | 0.17  | -0.02 |
| <b>Autonomic</b>            | Constipation         | Quantitative measure of constipation                                                                                      | + | -0.15 | -0.07 | 0.01  |
|                             | Orthostatic          | Blood pression from sitting/lying to stand up                                                                             | + | 0.17  | -0.09 | -0.06 |
|                             | UPDRS constipation   | Constipation                                                                                                              | + | 0.38  | 0.33  | -0.08 |
|                             | UPDRS pain           | Pain                                                                                                                      | + | 0.47  | 0.47  | -0.01 |
| <b>Cognitive</b>            | Education years      | Number of years of education                                                                                              | - | -0.21 | -0.23 | 0.16  |
|                             | MMSE total           | Measure of cognitive ability                                                                                              | - | -0.27 | -0.07 | 0.17  |
|                             | MOCA total           | Measure of cognitive ability                                                                                              | - | -0.31 | -0.06 | 0.23  |
|                             | Phonemic fluency     | Number of words beginning with a particular letter                                                                        | - | -0.26 | 0.03  | 0.14  |
|                             | Sementic fluency     | Number of animals and the number of boy names                                                                             | - | -0.28 | 0.09  | 0.15  |
|                             | BMI                  | Body Mass index                                                                                                           | + | 0.16  | 0.09  | -0.08 |
| <b>Motors</b>               | CGIC                 | Clinical global impression of change                                                                                      | + | 0.05  | -0.07 | 0.08  |
|                             | Disease Duration     | Disease Duration                                                                                                          | + | 0.24  | 0.19  | -0.07 |
|                             | Flamingo time        | Time that a person can stand on one leg                                                                                   | - | -0.46 | -0.03 | 0.16  |
|                             | Getgo average        | Time taken for an individual to get up from a chair, walk three meters, turn around, walk back to the chair and sit down. | + | 0.52  | 0.04  | -0.16 |
|                             | Purdue assembly      | Test to measure manual dexterity                                                                                          | - | -0.37 | 0.16  | 0.10  |
|                             | Purdue total         | Test to measure manual dexterity                                                                                          | - | -0.41 | 0.18  | 0.09  |
|                             | UPDRS arms           | Arms                                                                                                                      | + | 0.63  | -0.50 | 0.78  |
|                             | UPDRS bradykinesia   | Bradykinesia                                                                                                              | + | 0.63  | -0.40 | 0.57  |
|                             | UPDRS faceneck       | Face/neck problems                                                                                                        | + | 0.26  | -0.22 | 0.12  |
|                             | UPDRS I              | Non Motor Aspects of Experiences of Daily Living                                                                          | + | 0.68  | 0.67  | 0.02  |
|                             | UPDRS II             | Motor Aspects of Experiences of Daily Living                                                                              | + | 0.76  | 0.30  | 0.05  |
|                             | UPDRS III            | Motors Examination                                                                                                        | + | 0.71  | -0.46 | 0.61  |
|                             | UPDRS IV             | Motors complications                                                                                                      | + | 0.16  | 0.16  | 0.05  |
|                             | UPDRS laterality     | Unilateral                                                                                                                | + | -0.03 | -0.01 | 0.15  |
|                             | UPDRS legs           | Legs                                                                                                                      | + | 0.59  | -0.31 | 0.44  |
|                             | UPDRS postural       | Postural                                                                                                                  | + | 0.64  | -0.02 | -0.09 |
|                             | UPDRS rigidity       | Rigidity                                                                                                                  | + | 0.51  | -0.27 | 0.35  |



|       |              |                                                                      |   |      |       |       |
|-------|--------------|----------------------------------------------------------------------|---|------|-------|-------|
|       | UPDRS speech | Speech                                                               | + | 0.22 | -0.07 | -0.04 |
|       | UPDRS tremor | Tremor                                                               | + | 0.20 | -0.40 | 0.58  |
| Sleep | ESS total    | Measure of daytime sleepiness                                        | + | 0.31 | 0.22  | -0.07 |
|       | RBD total    | Measure of REM Sleep behavior disorder                               | + | 0.29 | 0.29  | -0.03 |
| e     |              |                                                                      |   |      |       |       |
|       | Sniff total  | Smell identifications                                                | - | 0.01 | 0.06  | 0.12  |
| Drug  |              |                                                                      |   |      |       |       |
|       | LEDD total   | Quantitative measure of the amount of Parkinson's disease medication | + | 0.31 | 0.27  | -0.22 |

11

12

13

14

15

16

17

18

19

- (1) A high score for a clinical measure indicates **more (+)** or **less (-)** issue for the patient.
- (2) The correlation coefficient under and above |0.25| are indicated in gray or blue/red respectively
- (3) Red and blue cells indicates when a high phenotypic axis score are associated with more and less clinical issues for the patient respectively.

1 **Fig.1**  
2

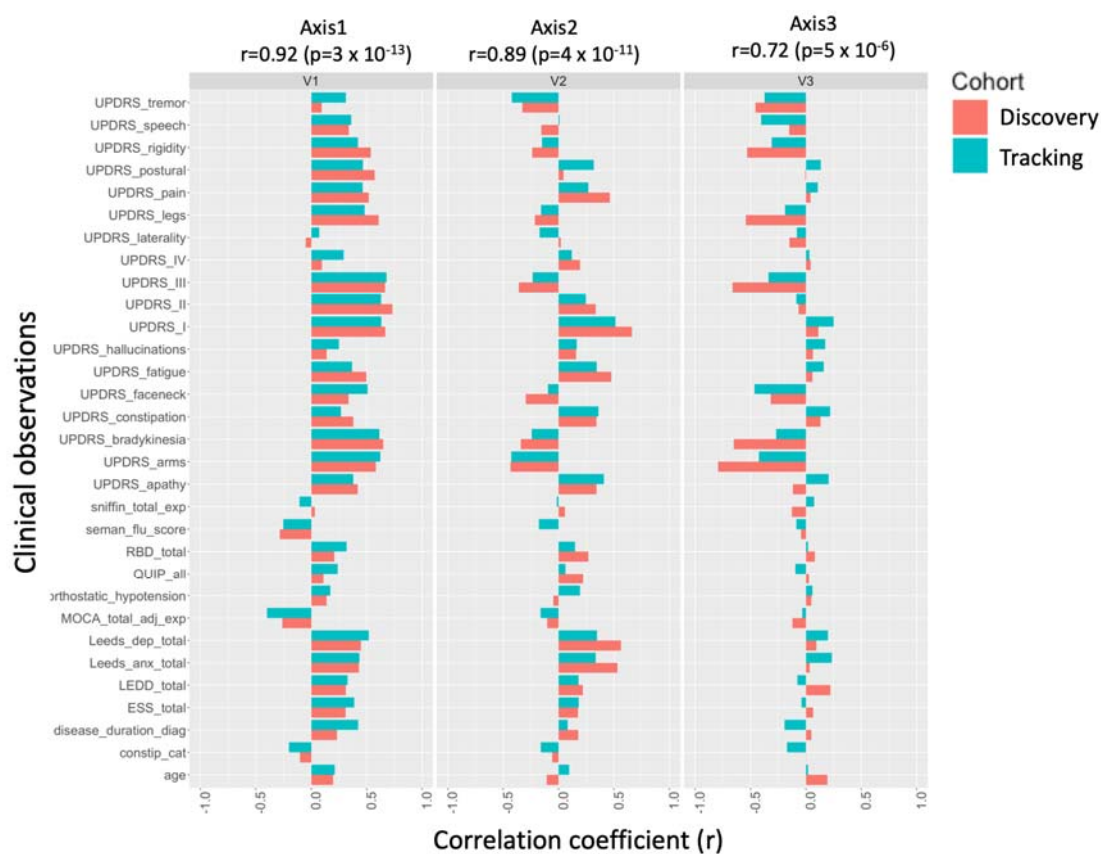

3  
4

1 **Fig. 2**  
2

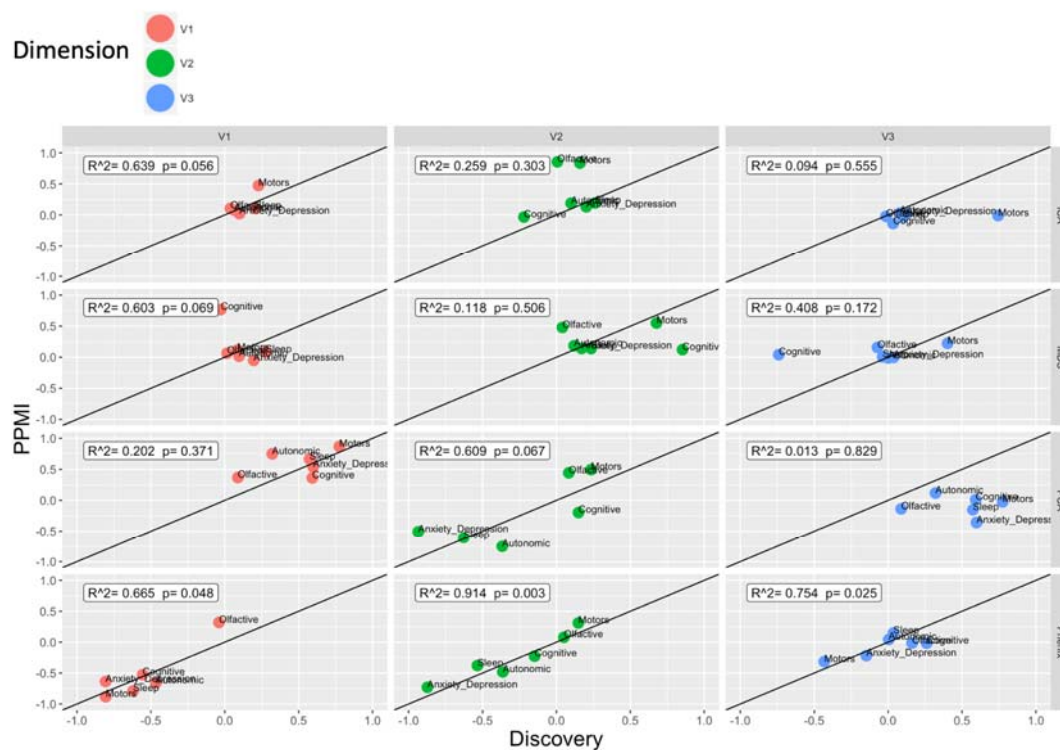

3

1 **Fig.3**  
2

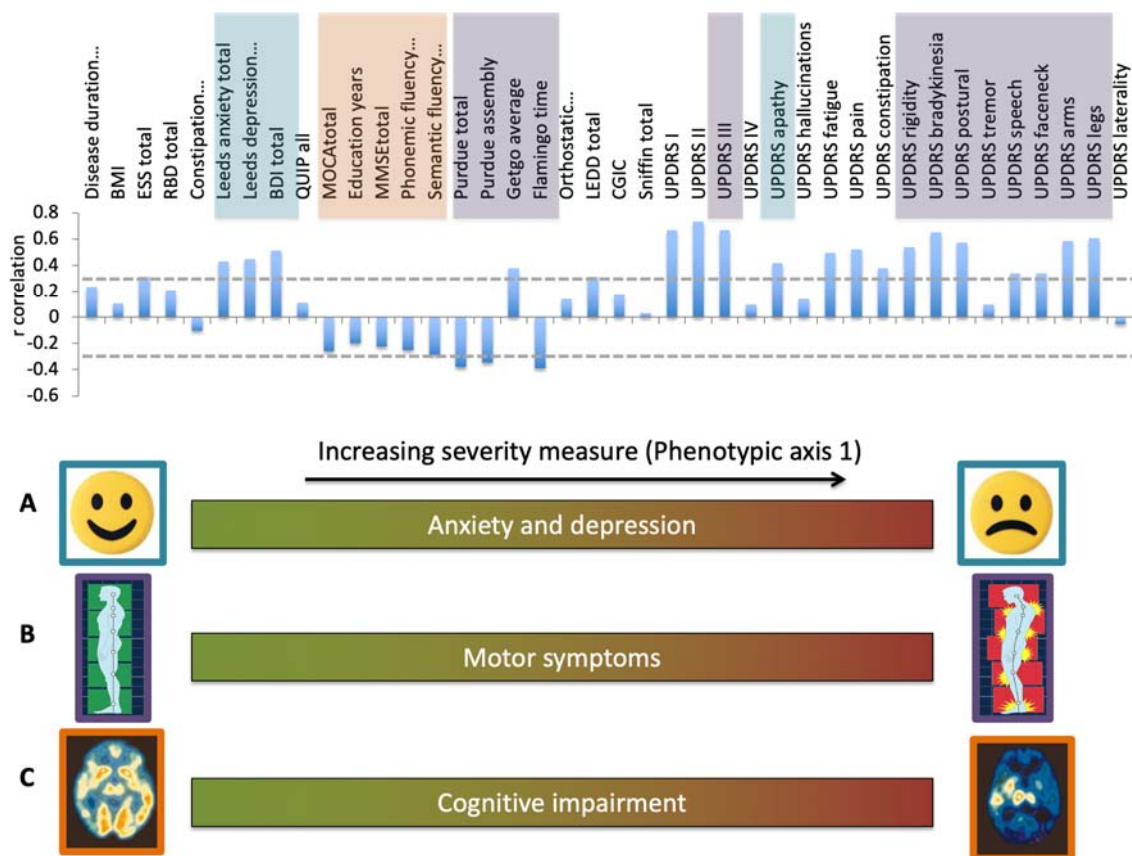

3  
4  
5  
6  
7  
8

1 **Fig. 4**  
2

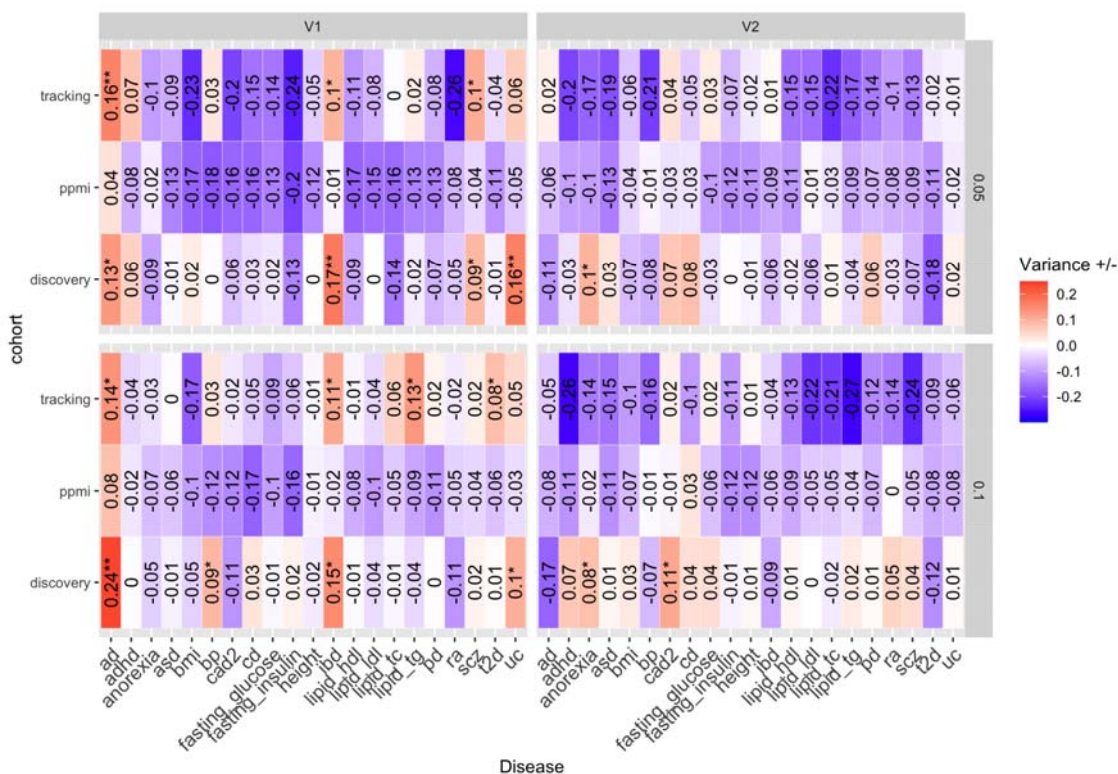

3  
4  
5
